# Supplementary material
Source: ML conference proceedings conference paper supplement (https://openreview.net/forum?id=u4wq305mNS)

Classical Model Size Scaling vs Virtual Logical Depth (VLD) Scaling

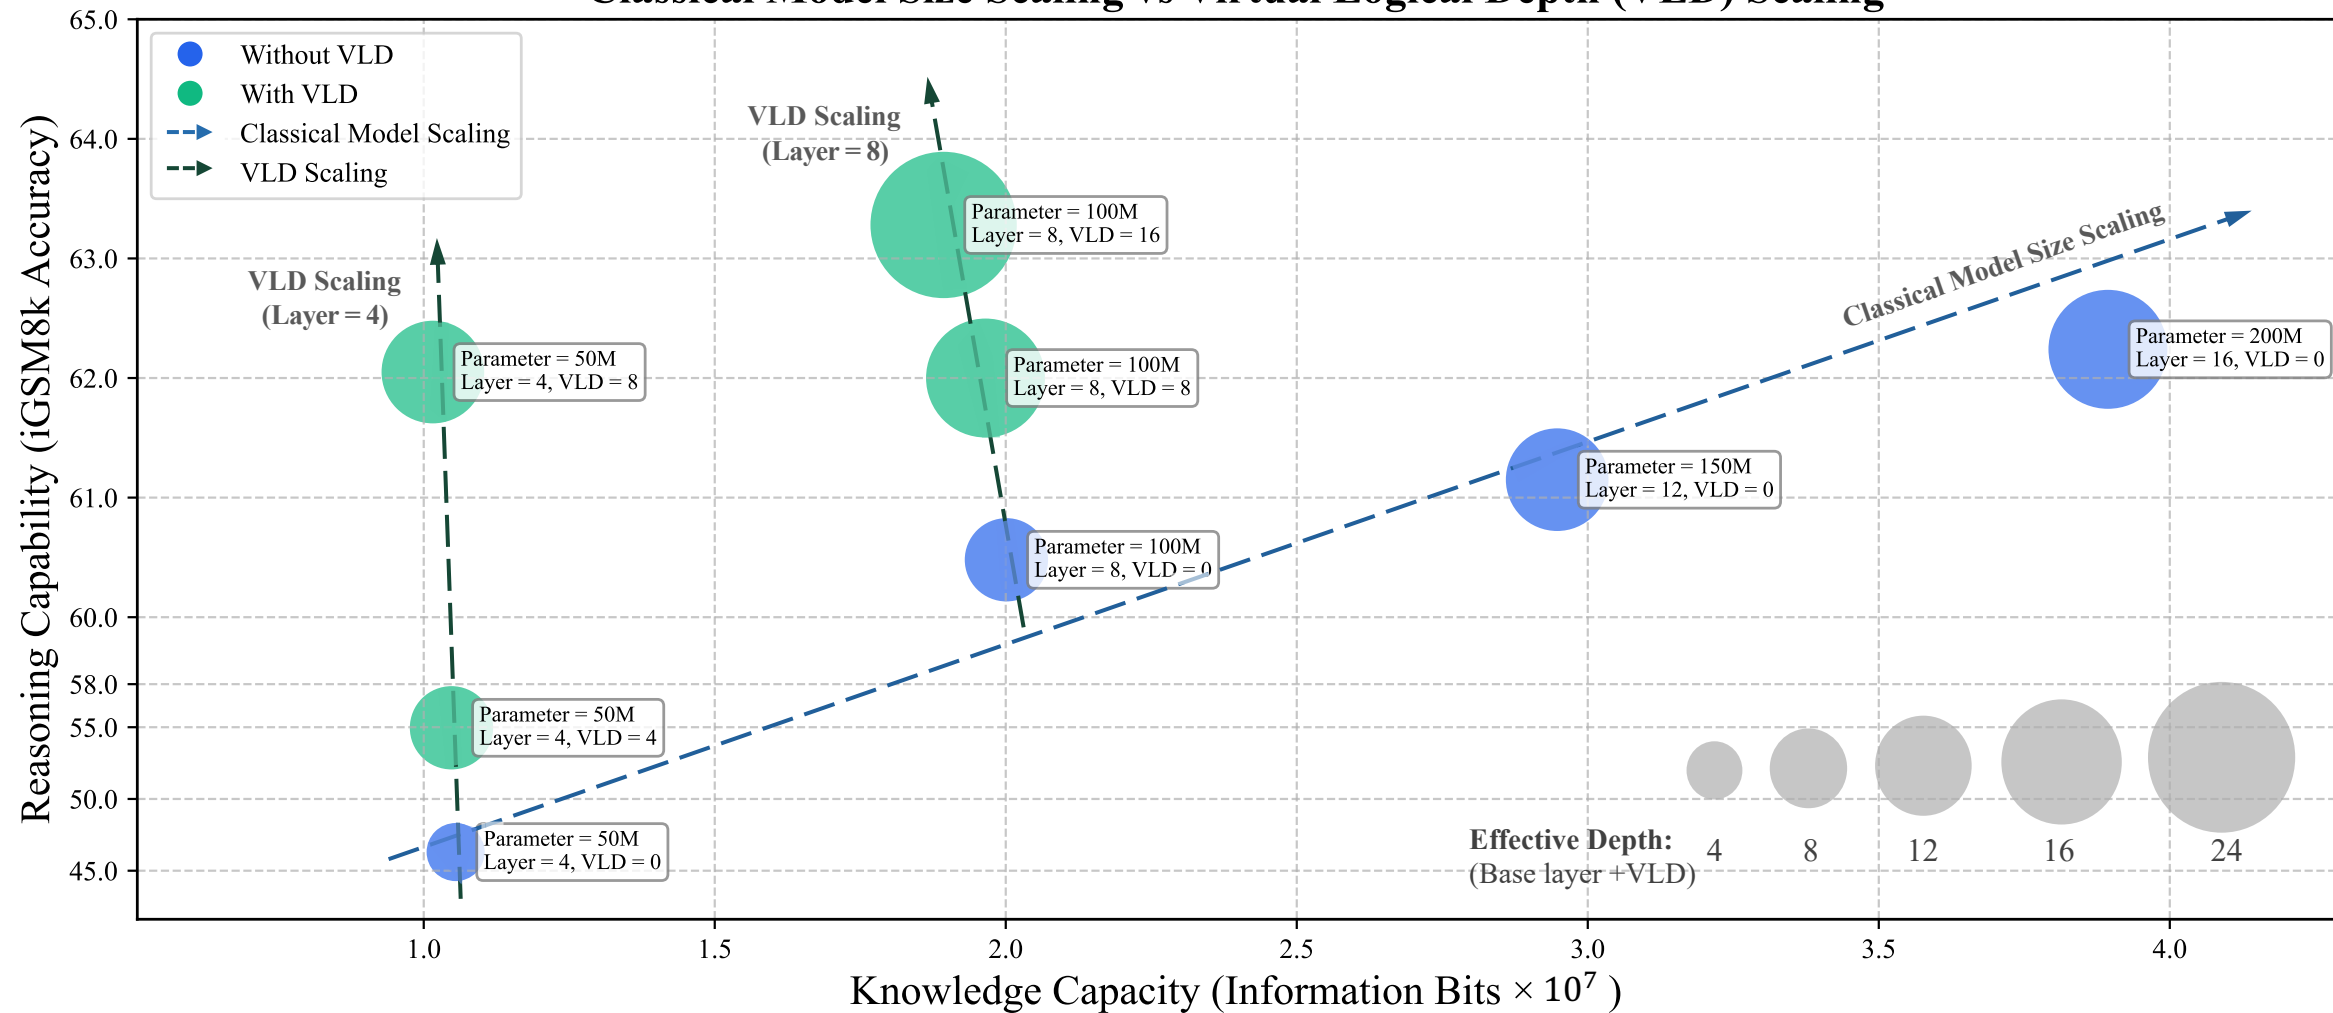

Supplement: supplementary_material [file main_fig.pdf › virtual_logical_depth-main/images/main_fig.pdf]

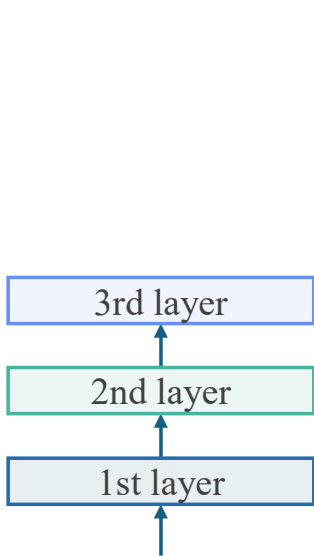

Input  
(a) BASE

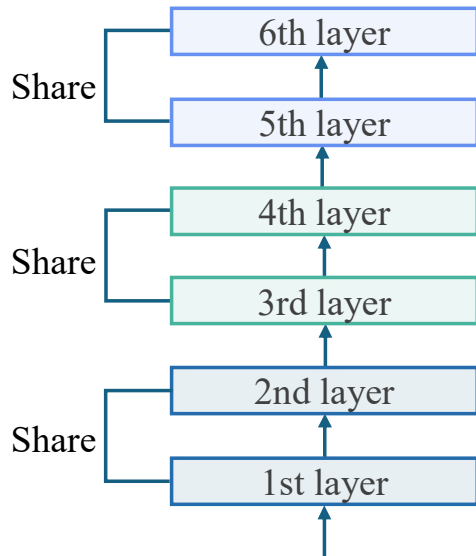

Input  
(b) SEQUENCE

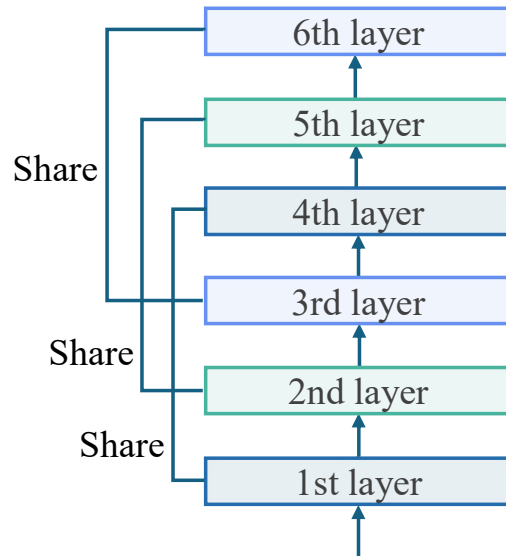

Input  
(c) CYCLE

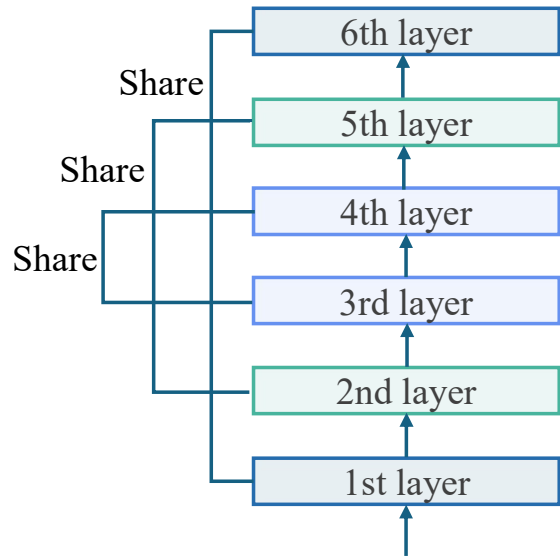

Input  
(d) INVERSE CYCLE

Supplement: supplementary_material [file repeat_pattern.pdf › virtual_logical_depth-main/images/repeat_pattern.pdf]
